# Supplementary material for: Transfer of regulatory T cells into abortion-prone mice promotes the expansion of uterine mast cells and normalizes early pregnancy angiogenesis
Source: PubMed Central journal article supplement (PMC4565045; doi:10.1038/srep13938), 2015-09-10
Supplement: srep13938-s1.pdf [file srep13938-s1.pdf]

## Supplementary information

### **Transfer of regulatory T cells into abortion-prone mice promotes the expansion of uterine mast cells and normalizes early pregnancy angiogenesis**

Katja Woidacki<sup>1,2</sup>, Nicole Meyer<sup>1,2</sup>, Anne Schumacher<sup>2</sup>, Alexandra Goldschmidt<sup>2</sup>, Marcus Maurer<sup>3</sup>, Ana Claudia Zenclussen<sup>2</sup>

<sup>1</sup> These authors contributed equally to this work

<sup>2</sup> Experimental Obstetrics and Gynecology, Medical Faculty, Otto-von-Guericke University, Magdeburg, Germany.

<sup>3</sup> Department of Dermatology and Allergy, Charité – Universitätsmedizin Berlin, Germany.

\*: Corresponding author: Ana C. Zenclussen, Experimental Obstetrics and Gynecology, Medical Faculty, Otto-von-Guericke University, Gerhart-Hauptmann Str. 35, 39108 Magdeburg, Germany. Phone: +49 391 6717460, Fax: +49 391 6717440, E-mail: [ana.zenclussen@med.ovgu.de](mailto:ana.zenclussen@med.ovgu.de)

Running title: Tregs contribute to angiogenesis through uMCs

## ***Legends to supplementary Figures***

### ***Supplementary Figure 1: Transfer of Tregs resulted in augmented expression of IL-3 and mSCF but not of IL-9 at the feto-maternal interface.***

Normal pregnant (NP, n=6), abortion-prone (AP, n=6-7) and abortion-prone animals transferred with Tregs (AP+Treg, n=6-9) were sacrificed at day 12 of pregnancy. IL-3, IL-9 and mSCF mRNA levels were analyzed by real time PCR and the data expressed as  $2^{-\Delta\text{CT}}$ . Data are shown as single values with medians. Statistically significant values are indicated as follows: \*p<0.050, \*\*p<0.005 (Mann Whitney-U test).

### ***Supplementary Figure 2: Blockage of IL-10 hampered the augmentation of Mcpt-1 in mice that have been transferred with Tregs***

Abortion-prone mice treated with Treg (AP + Treg, n=7), abortion-prone mice treated with Treg and 1 mg IgG (AP + IgG + Treg, n=4) as well as abortion-prone animals transferred with Tregs and treated with 1 mg anti-IL-10 at days 0 and 7 of pregnancy (AP+Treg, n=6-9) were sacrificed at day 12 of pregnancy. Mcpt-1 mRNA levels were analyzed by real time PCR and the data expressed as  $2^{-\Delta\text{CT}}$ . Data are shown as single values with medians. Statistically significant values are indicated as follows: \*p<0.050, \*\*p<0.005 (Mann Whitney-U test).

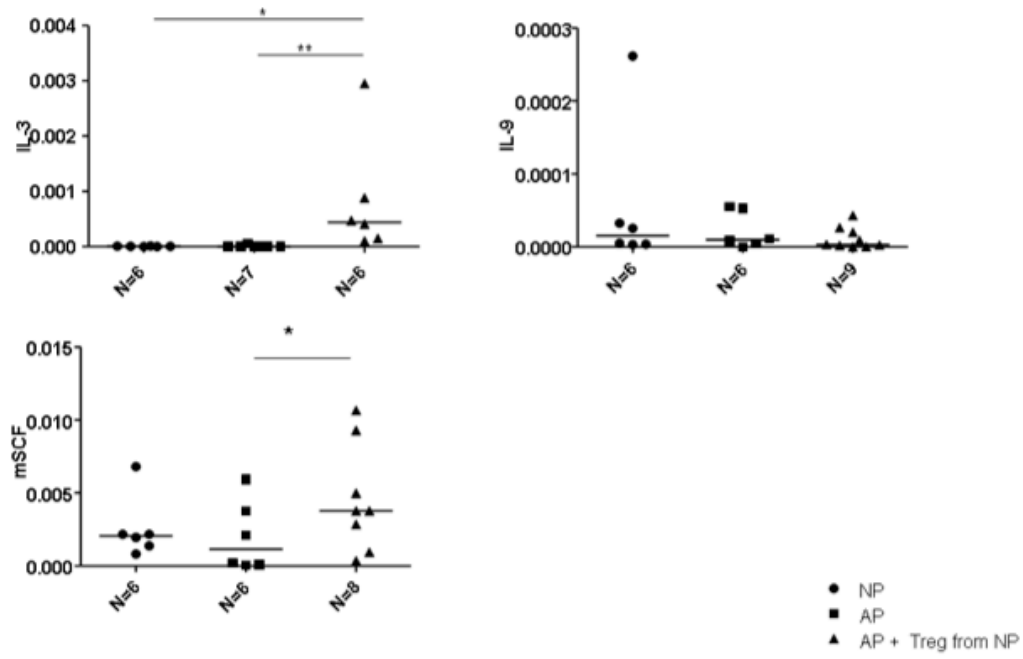

Suppl. Fig. 1

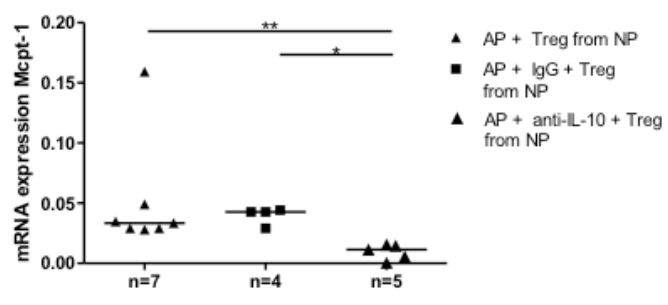

Suppl. Fig. 2
